# Supplementary material for: Peptide Uptake Is Essential for Borrelia burgdorferi Viability and Involves Structural and Regulatory Complexity of its Oligopeptide Transporter
Source: PubMed Central journal article supplement (PMC5736914; doi:10.1128/mbio.02047-17), 2017-12-19

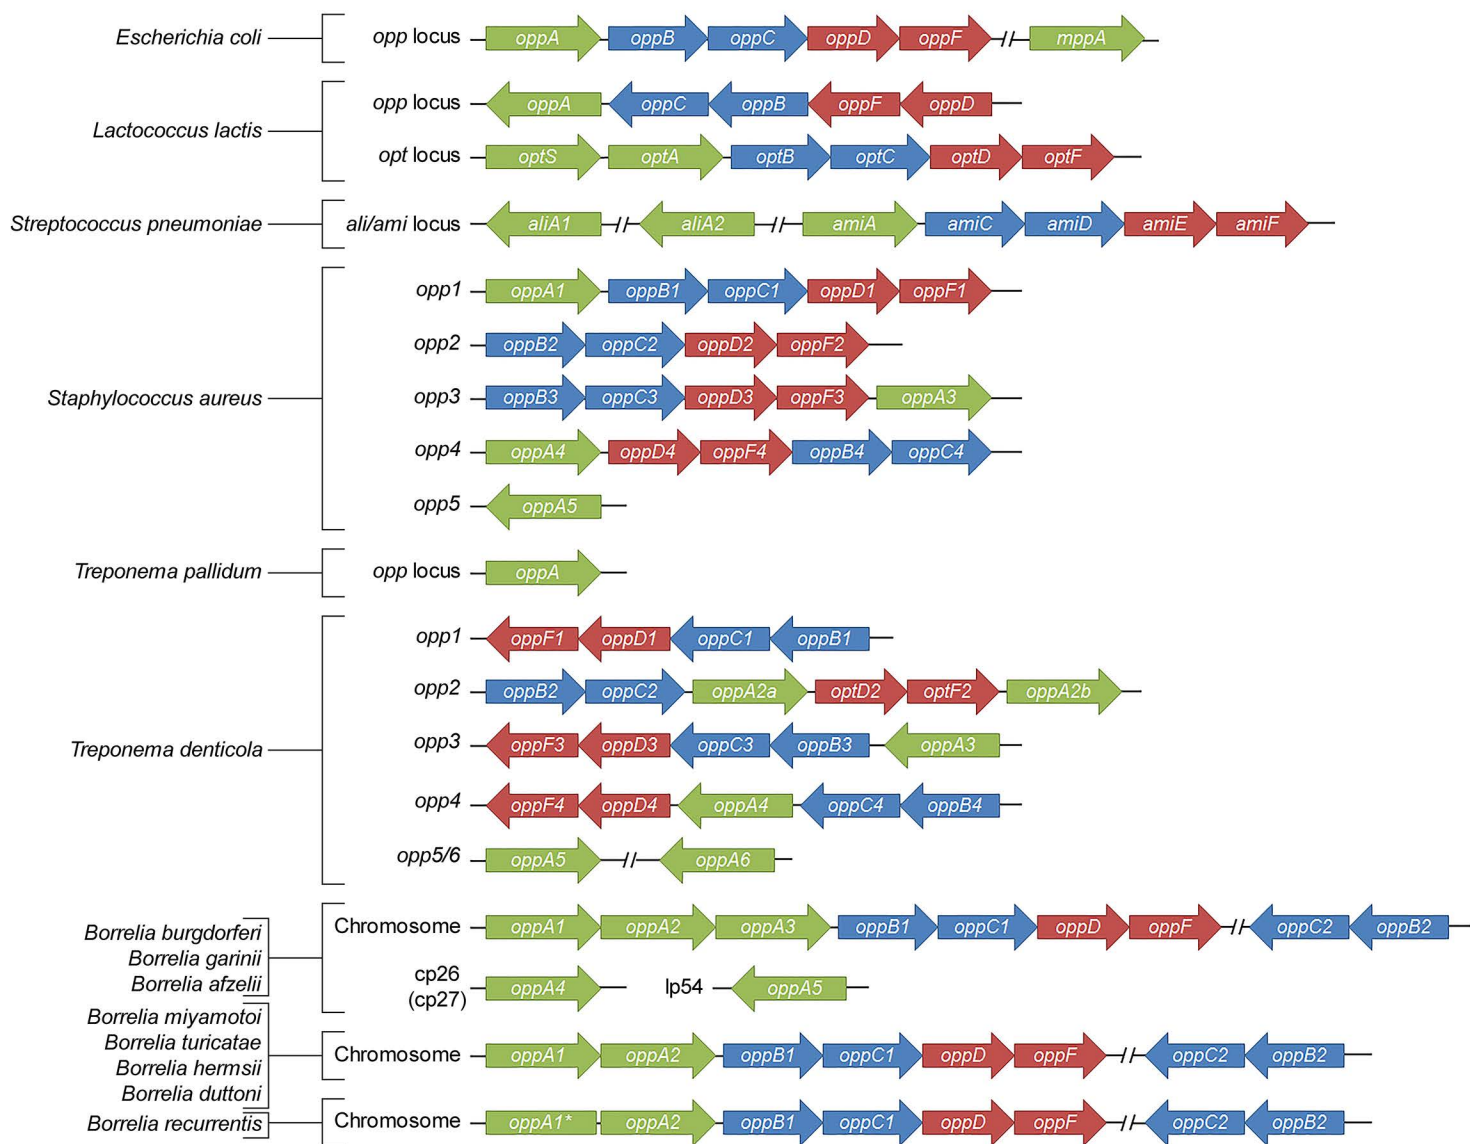

Supplement: mbo006173646sf1.pdf [file mbo006173646sf1.pdf]
